# Supplementary material for: Identification of oxidative phosphorylation-related genes in moyamoya disease by combining bulk RNA-sequencing analysis and machine learning
Source: Front Genet. 2024 Jun 10;15:1417329. doi: 10.3389/fgene.2024.1417329 (PMC11197386; doi:10.3389/fgene.2024.1417329)
Supplement: Supplementary file 2 [file Table3.XLSX]

## Sheet: Sheet1
Gene Symbol	Description	Category	Uniprot ID	Gifts	GC ID	Relevance score	GeneCards Link	DEGs between MMD and control
ELAC2	ElaC Ribonuclease Z 2	Protein Coding	Q9BQ52	46	GC17M012991	128.093	https://www.genecards.org/cgi-bin/carddisp.pl?gene=ELAC2	No
CARS2	Cysteinyl-TRNA Synthetase 2, Mitochondrial	Protein Coding	Q9HA77	45	GC13M110641	118.486	https://www.genecards.org/cgi-bin/carddisp.pl?gene=CARS2	No
FARS2	Phenylalanyl-TRNA Synthetase 2, Mitochondrial	Protein Coding	O95363	48	GC06P005499	105.668	https://www.genecards.org/cgi-bin/carddisp.pl?gene=FARS2	No
MTO1	Mitochondrial TRNA Translation Optimization 1	Protein Coding	Q9Y2Z2	47	GC06P073461	96.8942	https://www.genecards.org/cgi-bin/carddisp.pl?gene=MTO1	No
GFM1	G Elongation Factor Mitochondrial 1	Protein Coding	Q96RP9	48	GC03P158644	95.3739	https://www.genecards.org/cgi-bin/carddisp.pl?gene=GFM1	No
AIFM1	Apoptosis Inducing Factor Mitochondria Associated 1	Protein Coding	O95831	54	GC0XM130129	84.4253	https://www.genecards.org/cgi-bin/carddisp.pl?gene=AIFM1	No
AARS2	Alanyl-TRNA Synthetase 2, Mitochondrial	Protein Coding	Q5JTZ9	47	GC06M084225	79.8557	https://www.genecards.org/cgi-bin/carddisp.pl?gene=AARS2	Yes
NOS3	Nitric Oxide Synthase 3	Protein Coding	P29474	53	GC07P153537	74.3743	https://www.genecards.org/cgi-bin/carddisp.pl?gene=NOS3	No
NARS2	Asparaginyl-TRNA Synthetase 2, Mitochondrial	Protein Coding	Q96I59	47	GC11M078435	73.9111	https://www.genecards.org/cgi-bin/carddisp.pl?gene=NARS2	Yes
POLR1C	RNA Polymerase I And III Subunit C	Protein Coding	O15160	48	GC06P112228	73.1125	https://www.genecards.org/cgi-bin/carddisp.pl?gene=POLR1C	No
MTRFR	Mitochondrial Translation Release Factor In Rescue	Protein Coding	Q9H3J6	38	GC12P129139	71.1896	https://www.genecards.org/cgi-bin/carddisp.pl?gene=MTRFR	No
RAB33A	RAB33A, Member RAS Oncogene Family	Protein Coding	Q14088	40	GC0XP130110	69.1743	https://www.genecards.org/cgi-bin/carddisp.pl?gene=RAB33A	No
TSFM	Ts Translation Elongation Factor, Mitochondrial	Protein Coding	P43897	47	GC12P057782	68.9194	https://www.genecards.org/cgi-bin/carddisp.pl?gene=TSFM	No
TUFM	Tu Translation Elongation Factor, Mitochondrial	Protein Coding	P49411	48	GC16M041496	67.3674	https://www.genecards.org/cgi-bin/carddisp.pl?gene=TUFM	No
LOC126859565	CDK7 Strongly-Dependent Group 2 Enhancer GRCh37_chr6:5368745-5369944	Functional Element		3	GC06P005504	66.5708	https://www.genecards.org/cgi-bin/carddisp.pl?gene=LOC126859565	No
NOS2	Nitric Oxide Synthase 2	Protein Coding	P35228	53	GC17M027756	66.4148	https://www.genecards.org/cgi-bin/carddisp.pl?gene=NOS2	No
VARS2	Valyl-TRNA Synthetase 2, Mitochondrial	Protein Coding	Q5ST30	46	GC06P111978	65.6651	https://www.genecards.org/cgi-bin/carddisp.pl?gene=VARS2	No
EARS2	Glutamyl-TRNA Synthetase 2, Mitochondrial	Protein Coding	Q5JPH6	46	GC16M024534	64.8617	https://www.genecards.org/cgi-bin/carddisp.pl?gene=EARS2	No
PNPT1	Polyribonucleotide Nucleotidyltransferase 1	Protein Coding	Q8TCS8	47	GC02M055634	60.922	https://www.genecards.org/cgi-bin/carddisp.pl?gene=PNPT1	No
RMND1	Required For Meiotic Nuclear Division 1 Homolog	Protein Coding	Q9NWS8	41	GC06M151404	59.531	https://www.genecards.org/cgi-bin/carddisp.pl?gene=RMND1	Yes
MTFMT	Mitochondrial Methionyl-TRNA Formyltransferase	Protein Coding	Q96DP5	44	GC15M065001	58.4016	https://www.genecards.org/cgi-bin/carddisp.pl?gene=MTFMT	Yes
MAPK1	Mitogen-Activated Protein Kinase 1	Protein Coding	P28482	57	GC22M021759	56.8436	https://www.genecards.org/cgi-bin/carddisp.pl?gene=MAPK1	No
NOS1	Nitric Oxide Synthase 1	Protein Coding	P29475	53	GC12M117208	52.3331	https://www.genecards.org/cgi-bin/carddisp.pl?gene=NOS1	No
GTPBP3	GTP Binding Protein 3, Mitochondrial	Protein Coding	Q969Y2	45	GC19P089096	50.3452	https://www.genecards.org/cgi-bin/carddisp.pl?gene=GTPBP3	No
GFM2	GTP Dependent Ribosome Recycling Factor Mitochondrial 2	Protein Coding	Q969S9	45	GC05M074721	49.7524	https://www.genecards.org/cgi-bin/carddisp.pl?gene=GFM2	No
AKT1	AKT Serine/Threonine Kinase 1	Protein Coding	P31749	57	GC14M104769	49.1348	https://www.genecards.org/cgi-bin/carddisp.pl?gene=AKT1	No
TARS2	Threonyl-TRNA Synthetase 2, Mitochondrial	Protein Coding	Q9BW92	47	GC01P156781	48.1751	https://www.genecards.org/cgi-bin/carddisp.pl?gene=TARS2	No
MRPL44	Mitochondrial Ribosomal Protein L44	Protein Coding	Q9H9J2	45	GC02P223957	47.4048	https://www.genecards.org/cgi-bin/carddisp.pl?gene=MRPL44	No
FASTKD2	FAST Kinase Domains 2	Protein Coding	Q9NYY8	43	GC02P206766	46.589	https://www.genecards.org/cgi-bin/carddisp.pl?gene=FASTKD2	No
TP53	Tumor Protein P53	Protein Coding	P04637	57	GC17M007661	44.331	https://www.genecards.org/cgi-bin/carddisp.pl?gene=TP53	No
MAPK14	Mitogen-Activated Protein Kinase 14	Protein Coding	Q16539	54	GC06P112153	44.0669	https://www.genecards.org/cgi-bin/carddisp.pl?gene=MAPK14	No
MIPEP	Mitochondrial Intermediate Peptidase	Protein Coding	Q99797	46	GC13M023730	42.4428	https://www.genecards.org/cgi-bin/carddisp.pl?gene=MIPEP	No
MAPK8	Mitogen-Activated Protein Kinase 8	Protein Coding	P45983	53	GC10P048306	42.293	https://www.genecards.org/cgi-bin/carddisp.pl?gene=MAPK8	No
MRPS22	Mitochondrial Ribosomal Protein S22	Protein Coding	P82650	46	GC03P139005	41.1519	https://www.genecards.org/cgi-bin/carddisp.pl?gene=MRPS22	No
SLC25A26	Solute Carrier Family 25 Member 26	Protein Coding	Q70HW3	41	GC03P066120	40.8818	https://www.genecards.org/cgi-bin/carddisp.pl?gene=SLC25A26	No
SRC	SRC Proto-Oncogene, Non-Receptor Tyrosine Kinase	Protein Coding	P12931	55	GC20P037344	40.6962	https://www.genecards.org/cgi-bin/carddisp.pl?gene=SRC	No
SOD1	Superoxide Dismutase 1	Protein Coding	P00441	57	GC21P031659	39.7046	https://www.genecards.org/cgi-bin/carddisp.pl?gene=SOD1	No
ATP5F1A	ATP Synthase F1 Subunit Alpha	Protein Coding	P25705	50	GC18M046081	39.554	https://www.genecards.org/cgi-bin/carddisp.pl?gene=ATP5F1A	No
CAT	Catalase	Protein Coding	P04040	55	GC11P034460	39.0095	https://www.genecards.org/cgi-bin/carddisp.pl?gene=CAT	No
MARS2	Methionyl-TRNA Synthetase 2, Mitochondrial	Protein Coding	Q96GW9	46	GC02P197705	38.6187	https://www.genecards.org/cgi-bin/carddisp.pl?gene=MARS2	No
TNF	Tumor Necrosis Factor	Protein Coding	P01375	55	GC06P111998	38.5281	https://www.genecards.org/cgi-bin/carddisp.pl?gene=TNF	No
QRSL1	Glutaminyl-TRNA Amidotransferase Subunit QRSL1	Protein Coding	Q9H0R6	45	GC06P106629	37.5174	https://www.genecards.org/cgi-bin/carddisp.pl?gene=QRSL1	No
NFS1	NFS1 Cysteine Desulfurase	Protein Coding	Q9Y697	49	GC20M035668	37.2946	https://www.genecards.org/cgi-bin/carddisp.pl?gene=NFS1	No
TXN2	Thioredoxin 2	Protein Coding	Q99757	47	GC22M036467	36.803	https://www.genecards.org/cgi-bin/carddisp.pl?gene=TXN2	No
SOD2-OT1	SOD2 Overlapping Transcript 1	RNA Gene		13	GC06M159772	36.7988	https://www.genecards.org/cgi-bin/carddisp.pl?gene=SOD2-OT1	No
MAPK3	Mitogen-Activated Protein Kinase 3	Protein Coding	P27361	53	GC16M041633	36.5618	https://www.genecards.org/cgi-bin/carddisp.pl?gene=MAPK3	No
MRPS16	Mitochondrial Ribosomal Protein S16	Protein Coding	Q9Y3D3	46	GC10M073248	35.6795	https://www.genecards.org/cgi-bin/carddisp.pl?gene=MRPS16	No
C1QBP	Complement C1q Binding Protein	Protein Coding	Q07021	48	GC17M005432	35.2653	https://www.genecards.org/cgi-bin/carddisp.pl?gene=C1QBP	No
EGFR	Epidermal Growth Factor Receptor	Protein Coding	P00533	59	GC07P055019	35.1216	https://www.genecards.org/cgi-bin/carddisp.pl?gene=EGFR	No
POLRMT	RNA Polymerase Mitochondrial	Protein Coding	O00411	46	GC19M000617	35.0843	https://www.genecards.org/cgi-bin/carddisp.pl?gene=POLRMT	No
TRMT10C	TRNA Methyltransferase 10C, Mitochondrial RNase P Subunit	Protein Coding	Q7L0Y3	42	GC03P101561	34.4037	https://www.genecards.org/cgi-bin/carddisp.pl?gene=TRMT10C	No
VARS1	Valyl-TRNA Synthetase 1	Protein Coding	P26640	47	GC06M083967	34.3974	https://www.genecards.org/cgi-bin/carddisp.pl?gene=VARS1	No
STAT3	Signal Transducer And Activator Of Transcription 3	Protein Coding	P40763	58	GC17M042313	34.2498	https://www.genecards.org/cgi-bin/carddisp.pl?gene=STAT3	No
TRIT1	TRNA Isopentenyltransferase 1	Protein Coding	Q9H3H1	46	GC01M039842	34.1803	https://www.genecards.org/cgi-bin/carddisp.pl?gene=TRIT1	No
SHC1	SHC Adaptor Protein 1	Protein Coding	P29353	48	GC01M154962	33.2435	https://www.genecards.org/cgi-bin/carddisp.pl?gene=SHC1	No
MRPS34	Mitochondrial Ribosomal Protein S34	Protein Coding	P82930	41	GC16M001771	33.0924	https://www.genecards.org/cgi-bin/carddisp.pl?gene=MRPS34	No
SFXN4	Sideroflexin 4	Protein Coding	Q6P4A7	43	GC10M119140	33.0021	https://www.genecards.org/cgi-bin/carddisp.pl?gene=SFXN4	No
ATP5F1B	ATP Synthase F1 Subunit Beta	Protein Coding	P06576	48	GC12M057487	32.8961	https://www.genecards.org/cgi-bin/carddisp.pl?gene=ATP5F1B	No
PTCD3	Pentatricopeptide Repeat Domain 3	Protein Coding	Q96EY7	44	GC02P086106	32.2258	https://www.genecards.org/cgi-bin/carddisp.pl?gene=PTCD3	No
NSUN3	NOP2/Sun RNA Methyltransferase 3	Protein Coding	Q9H649	41	GC03P094062	32.1254	https://www.genecards.org/cgi-bin/carddisp.pl?gene=NSUN3	No
CDK1	Cyclin Dependent Kinase 1	Protein Coding	P06493	52	GC10P060772	31.7262	https://www.genecards.org/cgi-bin/carddisp.pl?gene=CDK1	No
MRPS2	Mitochondrial Ribosomal Protein S2	Protein Coding	Q9Y399	42	GC09P135499	31.7232	https://www.genecards.org/cgi-bin/carddisp.pl?gene=MRPS2	No
LOC126859646	MED14-Independent Group 3 Enhancer GRCh37_chr6:30889690-30890889	Functional Element		3	GC06P114753	31.4947	https://www.genecards.org/cgi-bin/carddisp.pl?gene=LOC126859646	No
C2orf69	Chromosome 2 Open Reading Frame 69	Protein Coding	Q8N8R5	38	GC02P199911	31.308	https://www.genecards.org/cgi-bin/carddisp.pl?gene=C2orf69	No
LYRM4	LYR Motif Containing 4	Protein Coding	Q9HD34	42	GC06M005033	31.2262	https://www.genecards.org/cgi-bin/carddisp.pl?gene=LYRM4	No
APP	Amyloid Beta Precursor Protein	Protein Coding	P05067	54	GC21M025880	30.9906	https://www.genecards.org/cgi-bin/carddisp.pl?gene=APP	No
NFE2L2	NFE2 Like BZIP Transcription Factor 2	Protein Coding	Q16236	55	GC02M177227	30.8619	https://www.genecards.org/cgi-bin/carddisp.pl?gene=NFE2L2	No
GATB	Glutamyl-TRNA Amidotransferase Subunit B	Protein Coding	O75879	45	GC04M151670	30.8045	https://www.genecards.org/cgi-bin/carddisp.pl?gene=GATB	No
HMOX1	Heme Oxygenase 1	Protein Coding	P09601	56	GC22P035380	30.7991	https://www.genecards.org/cgi-bin/carddisp.pl?gene=HMOX1	No
ATM	ATM Serine/Threonine Kinase	Protein Coding	Q13315	57	GC11P108222	30.2733	https://www.genecards.org/cgi-bin/carddisp.pl?gene=ATM	No
GATC	Glutamyl-TRNA Amidotransferase Subunit C	Protein Coding	O43716	42	GC12P120446	30.0015	https://www.genecards.org/cgi-bin/carddisp.pl?gene=GATC	No
SOD2	Superoxide Dismutase 2	Protein Coding	P04179	51	GC06M159669	29.909	https://www.genecards.org/cgi-bin/carddisp.pl?gene=SOD2	No
MICOS13	Mitochondrial Contact Site And Cristae Organizing System Subunit 13	Protein Coding	Q5XKP0	40	GC19M010853	29.7832	https://www.genecards.org/cgi-bin/carddisp.pl?gene=MICOS13	No
NUBPL	NUBP Iron-Sulfur Cluster Assembly Factor, Mitochondrial	Protein Coding	Q8TB37	45	GC14P031489	29.7492	https://www.genecards.org/cgi-bin/carddisp.pl?gene=NUBPL	No
RPS6KB1	Ribosomal Protein S6 Kinase B1	Protein Coding	P23443	53	GC17P059893	29.7268	https://www.genecards.org/cgi-bin/carddisp.pl?gene=RPS6KB1	No
CYCS	Cytochrome C, Somatic	Protein Coding	P99999	52	GC07M025118	29.7161	https://www.genecards.org/cgi-bin/carddisp.pl?gene=CYCS	No
JUN	Jun Proto-Oncogene, AP-1 Transcription Factor Subunit	Protein Coding	P05412	53	GC01M058780	29.7037	https://www.genecards.org/cgi-bin/carddisp.pl?gene=JUN	No
GSK3B	Glycogen Synthase Kinase 3 Beta	Protein Coding	P49841	54	GC03M119821	29.6855	https://www.genecards.org/cgi-bin/carddisp.pl?gene=GSK3B	No
PRKCA	Protein Kinase C Alpha	Protein Coding	P17252	54	GC17P066302	29.6326	https://www.genecards.org/cgi-bin/carddisp.pl?gene=PRKCA	No
MAPK10	Mitogen-Activated Protein Kinase 10	Protein Coding	P53779	53	GC04M085990	29.4664	https://www.genecards.org/cgi-bin/carddisp.pl?gene=MAPK10	No
LINC01672	Long Intergenic Non-Protein Coding RNA 1672	RNA Gene		13	GC01P007342	29.3678	https://www.genecards.org/cgi-bin/carddisp.pl?gene=LINC01672	No
DYRK1A	Dual Specificity Tyrosine Phosphorylation Regulated Kinase 1A	Protein Coding	Q13627	54	GC21P037365	29.3331	https://www.genecards.org/cgi-bin/carddisp.pl?gene=DYRK1A	No
TRMT5	TRNA Methyltransferase 5	Protein Coding	Q32P41	43	GC14M060971	29.2484	https://www.genecards.org/cgi-bin/carddisp.pl?gene=TRMT5	No
NDUFS4	NADH:Ubiquinone Oxidoreductase Subunit S4	Protein Coding	O43181	47	GC05P053560	29.2175	https://www.genecards.org/cgi-bin/carddisp.pl?gene=NDUFS4	No
MAPT	Microtubule Associated Protein Tau	Protein Coding	P10636	54	GC17P045894	29.2159	https://www.genecards.org/cgi-bin/carddisp.pl?gene=MAPT	No
PRKACA	Protein Kinase CAMP-Activated Catalytic Subunit Alpha	Protein Coding	P17612	56	GC19M015906	29.1475	https://www.genecards.org/cgi-bin/carddisp.pl?gene=PRKACA	No
MRPL3	Mitochondrial Ribosomal Protein L3	Protein Coding	P09001	46	GC03M131462	29.0386	https://www.genecards.org/cgi-bin/carddisp.pl?gene=MRPL3	No
BCL2	BCL2 Apoptosis Regulator	Protein Coding	P10415	55	GC18M063123	28.8854	https://www.genecards.org/cgi-bin/carddisp.pl?gene=BCL2	No
PRKCD	Protein Kinase C Delta	Protein Coding	Q05655	55	GC03P053156	28.8622	https://www.genecards.org/cgi-bin/carddisp.pl?gene=PRKCD	No
PRORP	Protein Only RNase P Catalytic Subunit	Protein Coding	O15091	41	GC14P040334	28.7929	https://www.genecards.org/cgi-bin/carddisp.pl?gene=PRORP	No
OLR1	Oxidized Low Density Lipoprotein Receptor 1	Protein Coding	P78380	46	GC12M025972	28.7088	https://www.genecards.org/cgi-bin/carddisp.pl?gene=OLR1	No
XDH	Xanthine Dehydrogenase	Protein Coding	P47989	51	GC02M031334	28.5464	https://www.genecards.org/cgi-bin/carddisp.pl?gene=XDH	No
CREB1	CAMP Responsive Element Binding Protein 1	Protein Coding	P16220	54	GC02P207529	28.4867	https://www.genecards.org/cgi-bin/carddisp.pl?gene=CREB1	Yes
DNAJC9-AS1	DNAJC9 And MRPS16 Antisense RNA 1	RNA Gene	A6NH13	21	GC10P073247	28.4614	https://www.genecards.org/cgi-bin/carddisp.pl?gene=DNAJC9-AS1	No
PIK3CG	Phosphatidylinositol-4,5-Bisphosphate 3-Kinase Catalytic Subunit Gamma	Protein Coding	P48736	53	GC07P106865	28.1981	https://www.genecards.org/cgi-bin/carddisp.pl?gene=PIK3CG	No
TIMM22	Translocase Of Inner Mitochondrial Membrane 22	Protein Coding	Q9Y584	41	GC17P000997	28.117	https://www.genecards.org/cgi-bin/carddisp.pl?gene=TIMM22	No
CDK2	Cyclin Dependent Kinase 2	Protein Coding	P24941	55	GC12P055966	28.0649	https://www.genecards.org/cgi-bin/carddisp.pl?gene=CDK2	No
MRPS7	Mitochondrial Ribosomal Protein S7	Protein Coding	Q9Y2R9	43	GC17P087209	28.02	https://www.genecards.org/cgi-bin/carddisp.pl?gene=MRPS7	No
ABL1	ABL Proto-Oncogene 1, Non-Receptor Tyrosine Kinase	Protein Coding	P00519	57	GC09P130713	27.9602	https://www.genecards.org/cgi-bin/carddisp.pl?gene=ABL1	No
IL6	Interleukin 6	Protein Coding	P05231	55	GC07P022725	27.9327	https://www.genecards.org/cgi-bin/carddisp.pl?gene=IL6	No
INS	Insulin	Protein Coding	P01308	51	GC11M002159	27.9091	https://www.genecards.org/cgi-bin/carddisp.pl?gene=INS	No
CSNK2A1	Casein Kinase 2 Alpha 1	Protein Coding	P68400	54	GC20M000472	27.9076	https://www.genecards.org/cgi-bin/carddisp.pl?gene=CSNK2A1	No
LOC126806484	CDK7 Strongly-Dependent Group 2 Enhancer GRCh37_chr2:207634423-207635622	Functional Element		3	GC02P206769	27.9019	https://www.genecards.org/cgi-bin/carddisp.pl?gene=LOC126806484	No
JAK2	Janus Kinase 2	Protein Coding	O60674	57	GC09P004985	27.7183	https://www.genecards.org/cgi-bin/carddisp.pl?gene=JAK2	No
DYRK2	Dual Specificity Tyrosine Phosphorylation Regulated Kinase 2	Protein Coding	Q92630	48	GC12P067558	27.6231	https://www.genecards.org/cgi-bin/carddisp.pl?gene=DYRK2	No
IRS1	Insulin Receptor Substrate 1	Protein Coding	P35568	51	GC02M226731	27.4968	https://www.genecards.org/cgi-bin/carddisp.pl?gene=IRS1	No
TAMM41	TAM41 Mitochondrial Translocator Assembly And Maintenance Homolog	Protein Coding	Q96BW9	40	GC03M011721	27.4181	https://www.genecards.org/cgi-bin/carddisp.pl?gene=TAMM41	No
MTOR	Mechanistic Target Of Rapamycin Kinase	Protein Coding	P42345	59	GC01M011106	27.3766	https://www.genecards.org/cgi-bin/carddisp.pl?gene=MTOR	No
RAF1	Raf-1 Proto-Oncogene, Serine/Threonine Kinase	Protein Coding	P04049	58	GC03M012583	27.1092	https://www.genecards.org/cgi-bin/carddisp.pl?gene=RAF1	No
STAT1	Signal Transducer And Activator Of Transcription 1	Protein Coding	P42224	57	GC02M190908	27.0417	https://www.genecards.org/cgi-bin/carddisp.pl?gene=STAT1	No
SERAC1	Serine Active Site Containing 1	Protein Coding	Q96JX3	40	GC06M158109	26.9195	https://www.genecards.org/cgi-bin/carddisp.pl?gene=SERAC1	No
TXN	Thioredoxin	Protein Coding	P10599	50	GC09M110243	26.7376	https://www.genecards.org/cgi-bin/carddisp.pl?gene=TXN	No
PTK2	Protein Tyrosine Kinase 2	Protein Coding	Q05397	52	GC08M140657	26.718	https://www.genecards.org/cgi-bin/carddisp.pl?gene=PTK2	No
CASP3	Caspase 3	Protein Coding	P42574	53	GC04M184627	26.3911	https://www.genecards.org/cgi-bin/carddisp.pl?gene=CASP3	No
IFNG	Interferon Gamma	Protein Coding	P01579	54	GC12M068154	26.2555	https://www.genecards.org/cgi-bin/carddisp.pl?gene=IFNG	No
ACAD9	Acyl-CoA Dehydrogenase Family Member 9	Protein Coding	Q9H845	49	GC03P136802	26.1102	https://www.genecards.org/cgi-bin/carddisp.pl?gene=ACAD9	No
MAP3K5	Mitogen-Activated Protein Kinase Kinase Kinase 5	Protein Coding	Q99683	52	GC06M136557	26.0865	https://www.genecards.org/cgi-bin/carddisp.pl?gene=MAP3K5	No
PTEN	Phosphatase And Tensin Homolog	Protein Coding	P60484	55	GC10P100942	25.9775	https://www.genecards.org/cgi-bin/carddisp.pl?gene=PTEN	No
ACADVL	Acyl-CoA Dehydrogenase Very Long Chain	Protein Coding	P49748	50	GC17P013984	25.5976	https://www.genecards.org/cgi-bin/carddisp.pl?gene=ACADVL	No
CDK5	Cyclin Dependent Kinase 5	Protein Coding	Q00535	57	GC07M151053	25.5761	https://www.genecards.org/cgi-bin/carddisp.pl?gene=CDK5	No
BDNF-AS	BDNF Antisense RNA	RNA Gene		22	GC11P027627	25.5614	https://www.genecards.org/cgi-bin/carddisp.pl?gene=BDNF-AS	No
HADHA	Hydroxyacyl-CoA Dehydrogenase Trifunctional Multienzyme Complex Subunit Alpha	Protein Coding	P40939	51	GC02M026190	25.5201	https://www.genecards.org/cgi-bin/carddisp.pl?gene=HADHA	No
MRPL12	Mitochondrial Ribosomal Protein L12	Protein Coding	P52815	44	GC17P087468	25.5146	https://www.genecards.org/cgi-bin/carddisp.pl?gene=MRPL12	No
OXSR1	Oxidative Stress Responsive Kinase 1	Protein Coding	O95747	45	GC03P038215	25.4505	https://www.genecards.org/cgi-bin/carddisp.pl?gene=OXSR1	No
PTK2B	Protein Tyrosine Kinase 2 Beta	Protein Coding	Q14289	53	GC08P027311	25.4501	https://www.genecards.org/cgi-bin/carddisp.pl?gene=PTK2B	No
PRORP-PSMA6	PRORP-PSMA6 Readthrough	RNA Gene		8	GC14P041377	25.2546	https://www.genecards.org/cgi-bin/carddisp.pl?gene=PRORP-PSMA6	No
GSR	Glutathione-Disulfide Reductase	Protein Coding	P00390	53	GC08M030678	25.2326	https://www.genecards.org/cgi-bin/carddisp.pl?gene=GSR	No
PLK1	Polo Like Kinase 1	Protein Coding	P53350	55	GC16P053178	25.1767	https://www.genecards.org/cgi-bin/carddisp.pl?gene=PLK1	No
PDPK1	3-Phosphoinositide Dependent Protein Kinase 1	Protein Coding	O15530	52	GC16P002537	24.9908	https://www.genecards.org/cgi-bin/carddisp.pl?gene=PDPK1	No
CAV1	Caveolin 1	Protein Coding	Q03135	52	GC07P116524	24.9511	https://www.genecards.org/cgi-bin/carddisp.pl?gene=CAV1	No
SYK	Spleen Associated Tyrosine Kinase	Protein Coding	P43405	54	GC09P095977	24.8837	https://www.genecards.org/cgi-bin/carddisp.pl?gene=SYK	Yes
CRLS1	Cardiolipin Synthase 1	Protein Coding	Q9UJA2	45	GC20P006005	24.8428	https://www.genecards.org/cgi-bin/carddisp.pl?gene=CRLS1	No
DYRK3	Dual Specificity Tyrosine Phosphorylation Regulated Kinase 3	Protein Coding	O43781	44	GC01P206636	24.7396	https://www.genecards.org/cgi-bin/carddisp.pl?gene=DYRK3	Yes
PTGS2	Prostaglandin-Endoperoxide Synthase 2	Protein Coding	P35354	53	GC01M186671	24.7053	https://www.genecards.org/cgi-bin/carddisp.pl?gene=PTGS2	No
MPO	Myeloperoxidase	Protein Coding	P05164	57	GC17M058269	24.6881	https://www.genecards.org/cgi-bin/carddisp.pl?gene=MPO	No
FYN	FYN Proto-Oncogene, Src Family Tyrosine Kinase	Protein Coding	P06241	52	GC06M111660	24.6159	https://www.genecards.org/cgi-bin/carddisp.pl?gene=FYN	No
GRB2	Growth Factor Receptor Bound Protein 2	Protein Coding	P62993	50	GC17M075318	24.4825	https://www.genecards.org/cgi-bin/carddisp.pl?gene=GRB2	No
PIK3CA	Phosphatidylinositol-4,5-Bisphosphate 3-Kinase Catalytic Subunit Alpha	Protein Coding	P42336	56	GC03P179148	24.3886	https://www.genecards.org/cgi-bin/carddisp.pl?gene=PIK3CA	No
INSR	Insulin Receptor	Protein Coding	P06213	58	GC19M007112	24.3759	https://www.genecards.org/cgi-bin/carddisp.pl?gene=INSR	Yes
PRKAA2	Protein Kinase AMP-Activated Catalytic Subunit Alpha 2	Protein Coding	P54646	54	GC01P056645	24.3516	https://www.genecards.org/cgi-bin/carddisp.pl?gene=PRKAA2	No
CTNNB1	Catenin Beta 1	Protein Coding	P35222	57	GC03P041194	24.316	https://www.genecards.org/cgi-bin/carddisp.pl?gene=CTNNB1	No
KNG1	Kininogen 1	Protein Coding	P01042	52	GC03P186717	24.3074	https://www.genecards.org/cgi-bin/carddisp.pl?gene=KNG1	No
PRKAA1	Protein Kinase AMP-Activated Catalytic Subunit Alpha 1	Protein Coding	Q13131	51	GC05M040759	24.2775	https://www.genecards.org/cgi-bin/carddisp.pl?gene=PRKAA1	No
EIF4EBP1	Eukaryotic Translation Initiation Factor 4E Binding Protein 1	Protein Coding	Q13541	50	GC08P039055	24.2453	https://www.genecards.org/cgi-bin/carddisp.pl?gene=EIF4EBP1	No
EGF	Epidermal Growth Factor	Protein Coding	P01133	55	GC04P109912	24.153	https://www.genecards.org/cgi-bin/carddisp.pl?gene=EGF	No
EME2	Essential Meiotic Structure-Specific Endonuclease Subunit 2	Protein Coding	A4GXA9	36	GC16P052419	24.1156	https://www.genecards.org/cgi-bin/carddisp.pl?gene=EME2	No
SIRT1	Sirtuin 1	Protein Coding	Q96EB6	53	GC10P067884	24.1124	https://www.genecards.org/cgi-bin/carddisp.pl?gene=SIRT1	No
NFKB1	Nuclear Factor Kappa B Subunit 1	Protein Coding	P19838	57	GC04P102501	24.093	https://www.genecards.org/cgi-bin/carddisp.pl?gene=NFKB1	No
SNCA	Synuclein Alpha	Protein Coding	P37840	55	GC04M089724	24.0248	https://www.genecards.org/cgi-bin/carddisp.pl?gene=SNCA	No
IL1B	Interleukin 1 Beta	Protein Coding	P01584	51	GC02M112829	24.0017	https://www.genecards.org/cgi-bin/carddisp.pl?gene=IL1B	No
FOXO1	Forkhead Box O1	Protein Coding	Q12778	55	GC13M040555	23.9788	https://www.genecards.org/cgi-bin/carddisp.pl?gene=FOXO1	No
PARP1	Poly(ADP-Ribose) Polymerase 1	Protein Coding	P09874	54	GC01M226360	23.9519	https://www.genecards.org/cgi-bin/carddisp.pl?gene=PARP1	No
CPT2	Carnitine Palmitoyltransferase 2	Protein Coding	P23786	53	GC01P053196	23.9518	https://www.genecards.org/cgi-bin/carddisp.pl?gene=CPT2	No
GAPDH	Glyceraldehyde-3-Phosphate Dehydrogenase	Protein Coding	P04406	54	GC12P030471	23.7761	https://www.genecards.org/cgi-bin/carddisp.pl?gene=GAPDH	No
HADHB	Hydroxyacyl-CoA Dehydrogenase Trifunctional Multienzyme Complex Subunit Beta	Protein Coding	P55084	50	GC02P026243	23.6974	https://www.genecards.org/cgi-bin/carddisp.pl?gene=HADHB	No
LYN	LYN Proto-Oncogene, Src Family Tyrosine Kinase	Protein Coding	P07948	53	GC08P055879	23.5859	https://www.genecards.org/cgi-bin/carddisp.pl?gene=LYN	No
PRKCB	Protein Kinase C Beta	Protein Coding	P05771	52	GC16P053182	23.5192	https://www.genecards.org/cgi-bin/carddisp.pl?gene=PRKCB	No
PRKCZ	Protein Kinase C Zeta	Protein Coding	Q05513	52	GC01P006114	23.47	https://www.genecards.org/cgi-bin/carddisp.pl?gene=PRKCZ	No
MAP2K1	Mitogen-Activated Protein Kinase Kinase 1	Protein Coding	Q02750	58	GC15P066386	23.4405	https://www.genecards.org/cgi-bin/carddisp.pl?gene=MAP2K1	Yes
MRPS25	Mitochondrial Ribosomal Protein S25	Protein Coding	P82663	44	GC03M024429	23.3792	https://www.genecards.org/cgi-bin/carddisp.pl?gene=MRPS25	No
DYRK1B	Dual Specificity Tyrosine Phosphorylation Regulated Kinase 1B	Protein Coding	Q9Y463	50	GC19M039825	23.3578	https://www.genecards.org/cgi-bin/carddisp.pl?gene=DYRK1B	No
PTPN11	Protein Tyrosine Phosphatase Non-Receptor Type 11	Protein Coding	Q06124	58	GC12P112418	23.2591	https://www.genecards.org/cgi-bin/carddisp.pl?gene=PTPN11	No
CEROX1	Cytoplasmic Endogenous Regulator Of Oxidative Phosphorylation 1	RNA Gene		15	GC16M013757	23.1925	https://www.genecards.org/cgi-bin/carddisp.pl?gene=CEROX1	No
CHEK1	Checkpoint Kinase 1	Protein Coding	O14757	54	GC11P125625	23.0641	https://www.genecards.org/cgi-bin/carddisp.pl?gene=CHEK1	No
HSP90AA1	Heat Shock Protein 90 Alpha Family Class A Member 1	Protein Coding	P07900	55	GC14M102080	22.925	https://www.genecards.org/cgi-bin/carddisp.pl?gene=HSP90AA1	No
VEGFA	Vascular Endothelial Growth Factor A	Protein Coding	P15692	53	GC06P043770	22.9136	https://www.genecards.org/cgi-bin/carddisp.pl?gene=VEGFA	No
MT-CO1	Mitochondrially Encoded Cytochrome C Oxidase I	Protein Coding	P00395	36	GCMTP005906	22.7624	https://www.genecards.org/cgi-bin/carddisp.pl?gene=MT-CO1	No
PIK3R1	Phosphoinositide-3-Kinase Regulatory Subunit 1	Protein Coding	P27986	55	GC05P068215	22.7059	https://www.genecards.org/cgi-bin/carddisp.pl?gene=PIK3R1	No
LCK	LCK Proto-Oncogene, Src Family Tyrosine Kinase	Protein Coding	P06239	56	GC01P032251	22.7021	https://www.genecards.org/cgi-bin/carddisp.pl?gene=LCK	No
MRPS23	Mitochondrial Ribosomal Protein S23	Protein Coding	Q9Y3D9	44	GC17M057834	22.6995	https://www.genecards.org/cgi-bin/carddisp.pl?gene=MRPS23	No
G6PD	Glucose-6-Phosphate Dehydrogenase	Protein Coding	P11413	54	GC0XM154583	22.6569	https://www.genecards.org/cgi-bin/carddisp.pl?gene=G6PD	No
EPRS1	Glutamyl-Prolyl-TRNA Synthetase 1	Protein Coding	P07814	48	GC01M219969	22.5938	https://www.genecards.org/cgi-bin/carddisp.pl?gene=EPRS1	No
ACADM	Acyl-CoA Dehydrogenase Medium Chain	Protein Coding	P11310	50	GC01P075724	22.5568	https://www.genecards.org/cgi-bin/carddisp.pl?gene=ACADM	No
PLCG1	Phospholipase C Gamma 1	Protein Coding	P19174	52	GC20P041136	22.5196	https://www.genecards.org/cgi-bin/carddisp.pl?gene=PLCG1	No
MRPS14	Mitochondrial Ribosomal Protein S14	Protein Coding	O60783	40	GC01M175010	22.3766	https://www.genecards.org/cgi-bin/carddisp.pl?gene=MRPS14	No
FOXO3	Forkhead Box O3	Protein Coding	O43524	51	GC06P108559	22.3761	https://www.genecards.org/cgi-bin/carddisp.pl?gene=FOXO3	No
KDR	Kinase Insert Domain Receptor	Protein Coding	P35968	57	GC04M055078	22.3524	https://www.genecards.org/cgi-bin/carddisp.pl?gene=KDR	No
COX5A	Cytochrome C Oxidase Subunit 5A	Protein Coding	P20674	48	GC15M074919	22.3013	https://www.genecards.org/cgi-bin/carddisp.pl?gene=COX5A	No
CHUK	Component Of Inhibitor Of Nuclear Factor Kappa B Kinase Complex	Protein Coding	O15111	54	GC10M100311	22.2967	https://www.genecards.org/cgi-bin/carddisp.pl?gene=CHUK	No
CHEK2	Checkpoint Kinase 2	Protein Coding	O96017	58	GC22M028687	22.2622	https://www.genecards.org/cgi-bin/carddisp.pl?gene=CHEK2	No
CDKN3	Cyclin Dependent Kinase Inhibitor 3	Protein Coding	Q16667	46	GC14P054398	22.2511	https://www.genecards.org/cgi-bin/carddisp.pl?gene=CDKN3	No
PRKN	Parkin RBR E3 Ubiquitin Protein Ligase	Protein Coding	O60260	53	GC06M161348	22.238	https://www.genecards.org/cgi-bin/carddisp.pl?gene=PRKN	No
LOC101928525	Uncharacterized LOC101928525	RNA Gene		13	GC09M135503	22.2294	https://www.genecards.org/cgi-bin/carddisp.pl?gene=LOC101928525	No
HSPB1	Heat Shock Protein Family B (Small) Member 1	Protein Coding	P04792	55	GC07P076302	22.1002	https://www.genecards.org/cgi-bin/carddisp.pl?gene=HSPB1	No
TGFB1	Transforming Growth Factor Beta 1	Protein Coding	P01137	57	GC19M041301	22.0794	https://www.genecards.org/cgi-bin/carddisp.pl?gene=TGFB1	No
CSNK2A2	Casein Kinase 2 Alpha 2	Protein Coding	P19784	50	GC16M058157	21.9249	https://www.genecards.org/cgi-bin/carddisp.pl?gene=CSNK2A2	No
LYRM4-AS1	LYRM4 Antisense RNA 1	RNA Gene		16	GC06P005491	21.9081	https://www.genecards.org/cgi-bin/carddisp.pl?gene=LYRM4-AS1	No
LOC112163529	BRD4-Independent Group 4 Enhancer GRCh37_chr12:120883528-120884727	Functional Element		4	GC12P120447	21.8838	https://www.genecards.org/cgi-bin/carddisp.pl?gene=LOC112163529	No
CXCL8	C-X-C Motif Chemokine Ligand 8	Protein Coding	P10145	48	GC04P073740	21.8201	https://www.genecards.org/cgi-bin/carddisp.pl?gene=CXCL8	No
MRPS28	Mitochondrial Ribosomal Protein S28	Protein Coding	Q9Y2Q9	44	GC08M079966	21.5576	https://www.genecards.org/cgi-bin/carddisp.pl?gene=MRPS28	No
IKBKB	Inhibitor Of Nuclear Factor Kappa B Kinase Subunit Beta	Protein Coding	O14920	58	GC08P042271	21.4711	https://www.genecards.org/cgi-bin/carddisp.pl?gene=IKBKB	No
HIF1A	Hypoxia Inducible Factor 1 Subunit Alpha	Protein Coding	Q16665	52	GC14P061695	21.4474	https://www.genecards.org/cgi-bin/carddisp.pl?gene=HIF1A	No
PARK7	Parkinsonism Associated Deglycase	Protein Coding	Q99497	51	GC01P008301	21.3738	https://www.genecards.org/cgi-bin/carddisp.pl?gene=PARK7	No
POLG	DNA Polymerase Gamma, Catalytic Subunit	Protein Coding	P54098	51	GC15M137554	21.3304	https://www.genecards.org/cgi-bin/carddisp.pl?gene=POLG	No
CAMK2G	Calcium/Calmodulin Dependent Protein Kinase II Gamma	Protein Coding	Q13555	52	GC10M073812	21.2259	https://www.genecards.org/cgi-bin/carddisp.pl?gene=CAMK2G	No
IGF1R	Insulin Like Growth Factor 1 Receptor	Protein Coding	P08069	58	GC15P098648	21.141	https://www.genecards.org/cgi-bin/carddisp.pl?gene=IGF1R	No
EIF2S1	Eukaryotic Translation Initiation Factor 2 Subunit Alpha	Protein Coding	P05198	48	GC14P067359	21.127	https://www.genecards.org/cgi-bin/carddisp.pl?gene=EIF2S1	No
MAPKAPK2	MAPK Activated Protein Kinase 2	Protein Coding	P49137	51	GC01P206684	21.0431	https://www.genecards.org/cgi-bin/carddisp.pl?gene=MAPKAPK2	No
CDKN1B	Cyclin Dependent Kinase Inhibitor 1B	Protein Coding	P46527	53	GC12P030709	21.0241	https://www.genecards.org/cgi-bin/carddisp.pl?gene=CDKN1B	No
EDN1	Endothelin 1	Protein Coding	P05305	53	GC06P012236	20.9982	https://www.genecards.org/cgi-bin/carddisp.pl?gene=EDN1	No
CPT1A	Carnitine Palmitoyltransferase 1A	Protein Coding	P50416	51	GC11M068754	20.8151	https://www.genecards.org/cgi-bin/carddisp.pl?gene=CPT1A	No
PPARG	Peroxisome Proliferator Activated Receptor Gamma	Protein Coding	P37231	57	GC03P012287	20.7498	https://www.genecards.org/cgi-bin/carddisp.pl?gene=PPARG	No
RPS6KA1	Ribosomal Protein S6 Kinase A1	Protein Coding	Q15418	54	GC01P030217	20.5828	https://www.genecards.org/cgi-bin/carddisp.pl?gene=RPS6KA1	No
EIF4E	Eukaryotic Translation Initiation Factor 4E	Protein Coding	P06730	53	GC04M098879	20.5789	https://www.genecards.org/cgi-bin/carddisp.pl?gene=EIF4E	No
CDK4	Cyclin Dependent Kinase 4	Protein Coding	P11802	58	GC12M058829	20.4849	https://www.genecards.org/cgi-bin/carddisp.pl?gene=CDK4	No
IGF1	Insulin Like Growth Factor 1	Protein Coding	P05019	52	GC12M102395	20.4242	https://www.genecards.org/cgi-bin/carddisp.pl?gene=IGF1	No
BAX	BCL2 Associated X, Apoptosis Regulator	Protein Coding	Q07812	55	GC19P048954	20.4085	https://www.genecards.org/cgi-bin/carddisp.pl?gene=BAX	No
GGA2	Golgi Associated, Gamma Adaptin Ear Containing, ARF Binding Protein 2	Protein Coding	Q9UJY4	41	GC16M024530	20.3384	https://www.genecards.org/cgi-bin/carddisp.pl?gene=GGA2	No
ACP1	Acid Phosphatase 1	Protein Coding	P24666	48	GC02P000541	20.3157	https://www.genecards.org/cgi-bin/carddisp.pl?gene=ACP1	No
MAPK9	Mitogen-Activated Protein Kinase 9	Protein Coding	P45984	52	GC05M180283	20.2046	https://www.genecards.org/cgi-bin/carddisp.pl?gene=MAPK9	No
CYP3A4	Cytochrome P450 Family 3 Subfamily A Member 4	Protein Coding	P08684	52	GC07M099834	20.1886	https://www.genecards.org/cgi-bin/carddisp.pl?gene=CYP3A4	No
NFKBIA	NFKB Inhibitor Alpha	Protein Coding	P25963	54	GC14M035401	20.1604	https://www.genecards.org/cgi-bin/carddisp.pl?gene=NFKBIA	No
CERNA3	Competing Endogenous LncRNA 3 For MiR-645	RNA Gene		13	GC08P056092	20.1599	https://www.genecards.org/cgi-bin/carddisp.pl?gene=CERNA3	No
MYCL-AS1	MYCL Antisense RNA 1	RNA Gene		14	GC01P039871	20.1332	https://www.genecards.org/cgi-bin/carddisp.pl?gene=MYCL-AS1	No
NDUFS1	NADH:Ubiquinone Oxidoreductase Core Subunit S1	Protein Coding	P28331	49	GC02M206114	20.0641	https://www.genecards.org/cgi-bin/carddisp.pl?gene=NDUFS1	No
PRKD1	Protein Kinase D1	Protein Coding	Q15139	53	GC14M029576	20.055	https://www.genecards.org/cgi-bin/carddisp.pl?gene=PRKD1	No
CDKN1A	Cyclin Dependent Kinase Inhibitor 1A	Protein Coding	P38936	53	GC06P112162	19.9991	https://www.genecards.org/cgi-bin/carddisp.pl?gene=CDKN1A	No
PRKG1	Protein Kinase CGMP-Dependent 1	Protein Coding	Q13976	54	GC10P050991	19.9655	https://www.genecards.org/cgi-bin/carddisp.pl?gene=PRKG1	No
SP1	Sp1 Transcription Factor	Protein Coding	P08047	50	GC12P053380	19.9605	https://www.genecards.org/cgi-bin/carddisp.pl?gene=SP1	No
ACADS	Acyl-CoA Dehydrogenase Short Chain	Protein Coding	P16219	49	GC12P129086	19.9439	https://www.genecards.org/cgi-bin/carddisp.pl?gene=ACADS	No
OGG1	8-Oxoguanine DNA Glycosylase	Protein Coding	O15527	51	GC03P018314	19.9166	https://www.genecards.org/cgi-bin/carddisp.pl?gene=OGG1	No
NDUFV1	NADH:Ubiquinone Oxidoreductase Core Subunit V1	Protein Coding	P49821	50	GC11P080012	19.7818	https://www.genecards.org/cgi-bin/carddisp.pl?gene=NDUFV1	No
RB1	RB Transcriptional Corepressor 1	Protein Coding	P06400	52	GC13P048303	19.7339	https://www.genecards.org/cgi-bin/carddisp.pl?gene=RB1	No
CSK	C-Terminal Src Kinase	Protein Coding	P41240	51	GC15P074782	19.6222	https://www.genecards.org/cgi-bin/carddisp.pl?gene=CSK	Yes
GPX1	Glutathione Peroxidase 1	Protein Coding	P07203	49	GC03M052674	19.5933	https://www.genecards.org/cgi-bin/carddisp.pl?gene=GPX1	No
BAD	BCL2 Associated Agonist Of Cell Death	Protein Coding	Q92934	48	GC11M113468	19.4523	https://www.genecards.org/cgi-bin/carddisp.pl?gene=BAD	No
MIEF2	Mitochondrial Elongation Factor 2	Protein Coding	Q96C03	39	GC17P085621	19.4302	https://www.genecards.org/cgi-bin/carddisp.pl?gene=MIEF2	No
PIN1	Peptidylprolyl Cis/Trans Isomerase, NIMA-Interacting 1	Protein Coding	Q13526	51	GC19P009835	19.4047	https://www.genecards.org/cgi-bin/carddisp.pl?gene=PIN1	No
RPS6KA5	Ribosomal Protein S6 Kinase A5	Protein Coding	O75582	51	GC14M090847	19.3026	https://www.genecards.org/cgi-bin/carddisp.pl?gene=RPS6KA5	No
ESR1	Estrogen Receptor 1	Protein Coding	P03372	58	GC06P151656	19.2921	https://www.genecards.org/cgi-bin/carddisp.pl?gene=ESR1	Yes
BRCA1	BRCA1 DNA Repair Associated	Protein Coding	P38398	54	GC17M043044	19.2253	https://www.genecards.org/cgi-bin/carddisp.pl?gene=BRCA1	No
FOS	Fos Proto-Oncogene, AP-1 Transcription Factor Subunit	Protein Coding	P01100	55	GC14P075278	19.199	https://www.genecards.org/cgi-bin/carddisp.pl?gene=FOS	No
TMX2-CTNND1	TMX2-CTNND1 Readthrough (NMD Candidate)	RNA Gene		17	GC11P057712	19.1589	https://www.genecards.org/cgi-bin/carddisp.pl?gene=TMX2-CTNND1	No
PAK1	P21 (RAC1) Activated Kinase 1	Protein Coding	Q13153	54	GC11M113975	19.1413	https://www.genecards.org/cgi-bin/carddisp.pl?gene=PAK1	No
PPARGC1A	PPARG Coactivator 1 Alpha	Protein Coding	Q9UBK2	51	GC04M023755	19.1282	https://www.genecards.org/cgi-bin/carddisp.pl?gene=PPARGC1A	Yes
NDUFS2	NADH:Ubiquinone Oxidoreductase Core Subunit S2	Protein Coding	O75306	47	GC01P161197	19.1214	https://www.genecards.org/cgi-bin/carddisp.pl?gene=NDUFS2	No
EIF2AK2	Eukaryotic Translation Initiation Factor 2 Alpha Kinase 2	Protein Coding	P19525	54	GC02M037099	18.941	https://www.genecards.org/cgi-bin/carddisp.pl?gene=EIF2AK2	No
ALB	Albumin	Protein Coding	P02768	53	GC04P073397	18.9324	https://www.genecards.org/cgi-bin/carddisp.pl?gene=ALB	No
OSGIN1	Oxidative Stress Induced Growth Inhibitor 1	Protein Coding	Q9UJX0	39	GC16P083934	18.911	https://www.genecards.org/cgi-bin/carddisp.pl?gene=OSGIN1	No
CS	Citrate Synthase	Protein Coding	O75390	48	GC12M056271	18.8889	https://www.genecards.org/cgi-bin/carddisp.pl?gene=CS	No
MDM2	MDM2 Proto-Oncogene	Protein Coding	Q00987	57	GC12P068808	18.7329	https://www.genecards.org/cgi-bin/carddisp.pl?gene=MDM2	Yes
PRKAB1	Protein Kinase AMP-Activated Non-Catalytic Subunit Beta 1	Protein Coding	Q9Y478	52	GC12P119632	18.6755	https://www.genecards.org/cgi-bin/carddisp.pl?gene=PRKAB1	No
LRRK2	Leucine Rich Repeat Kinase 2	Protein Coding	Q5S007	53	GC12P040196	18.6664	https://www.genecards.org/cgi-bin/carddisp.pl?gene=LRRK2	No
CYC1	Cytochrome C1	Protein Coding	P08574	49	GC08P144095	18.6473	https://www.genecards.org/cgi-bin/carddisp.pl?gene=CYC1	No
WARS2	Tryptophanyl TRNA Synthetase 2, Mitochondrial	Protein Coding	Q9UGM6	49	GC01M119031	18.5701	https://www.genecards.org/cgi-bin/carddisp.pl?gene=WARS2	No
ACOX1	Acyl-CoA Oxidase 1	Protein Coding	Q15067	50	GC17M075941	18.5689	https://www.genecards.org/cgi-bin/carddisp.pl?gene=ACOX1	No
MAP2K4	Mitogen-Activated Protein Kinase Kinase 4	Protein Coding	P45985	52	GC17P012020	18.5429	https://www.genecards.org/cgi-bin/carddisp.pl?gene=MAP2K4	No
TLR4	Toll Like Receptor 4	Protein Coding	O00206	55	GC09P117704	18.5083	https://www.genecards.org/cgi-bin/carddisp.pl?gene=TLR4	No
SMAD2	SMAD Family Member 2	Protein Coding	Q15796	56	GC18M047809	18.5061	https://www.genecards.org/cgi-bin/carddisp.pl?gene=SMAD2	Yes
H2AX	H2A.X Variant Histone	Protein Coding	P16104	48	GC11M119451	18.4303	https://www.genecards.org/cgi-bin/carddisp.pl?gene=H2AX	No
NQO1	NAD(P)H Quinone Dehydrogenase 1	Protein Coding	P15559	52	GC16M069706	18.4272	https://www.genecards.org/cgi-bin/carddisp.pl?gene=NQO1	No
PINK1	PTEN Induced Kinase 1	Protein Coding	Q9BXM7	50	GC01P020634	18.4095	https://www.genecards.org/cgi-bin/carddisp.pl?gene=PINK1	No
CYBB	Cytochrome B-245 Beta Chain	Protein Coding	P04839	53	GC0XP037780	18.3824	https://www.genecards.org/cgi-bin/carddisp.pl?gene=CYBB	No
MT-CYB	Mitochondrially Encoded Cytochrome B	Protein Coding	P00156	36	GCMTP014749	18.3585	https://www.genecards.org/cgi-bin/carddisp.pl?gene=MT-CYB	No
PXN	Paxillin	Protein Coding	P49023	50	GC12M120210	18.3522	https://www.genecards.org/cgi-bin/carddisp.pl?gene=PXN	No
ATF2	Activating Transcription Factor 2	Protein Coding	P15336	52	GC02M175072	18.3085	https://www.genecards.org/cgi-bin/carddisp.pl?gene=ATF2	No
KRIT1	KRIT1 Ankyrin Repeat Containing	Protein Coding	O00522	46	GC07M092198	18.2634	https://www.genecards.org/cgi-bin/carddisp.pl?gene=KRIT1	No
PTPN6	Protein Tyrosine Phosphatase Non-Receptor Type 6	Protein Coding	P29350	53	GC12P030500	18.2557	https://www.genecards.org/cgi-bin/carddisp.pl?gene=PTPN6	Yes
PRKCE	Protein Kinase C Epsilon	Protein Coding	Q02156	52	GC02P045651	18.2116	https://www.genecards.org/cgi-bin/carddisp.pl?gene=PRKCE	No
NOS1AP	Nitric Oxide Synthase 1 Adaptor Protein	Protein Coding	O75052	44	GC01P162069	18.2065	https://www.genecards.org/cgi-bin/carddisp.pl?gene=NOS1AP	No
PON1	Paraoxonase 1	Protein Coding	P27169	51	GC07M095297	18.1984	https://www.genecards.org/cgi-bin/carddisp.pl?gene=PON1	No
TPD52-MRPS28	TPD52-MRPS28 Readthrough	Protein Coding		8	GC08M079968	18.0872	https://www.genecards.org/cgi-bin/carddisp.pl?gene=TPD52-MRPS28	No
ZAP70	Zeta Chain Of T Cell Receptor Associated Protein Kinase 70	Protein Coding	P43403	55	GC02P097845	18.0253	https://www.genecards.org/cgi-bin/carddisp.pl?gene=ZAP70	No
CYBA	Cytochrome B-245 Alpha Chain	Protein Coding	P13498	51	GC16M088643	18.023	https://www.genecards.org/cgi-bin/carddisp.pl?gene=CYBA	No
HSD17B4	Hydroxysteroid 17-Beta Dehydrogenase 4	Protein Coding	P51659	50	GC05P119452	18.0159	https://www.genecards.org/cgi-bin/carddisp.pl?gene=HSD17B4	No
ERBB2	Erb-B2 Receptor Tyrosine Kinase 2	Protein Coding	P04626	59	GC17P039687	17.9884	https://www.genecards.org/cgi-bin/carddisp.pl?gene=ERBB2	No
BCL2L1	BCL2 Like 1	Protein Coding	Q07817	52	GC20M031664	17.9769	https://www.genecards.org/cgi-bin/carddisp.pl?gene=BCL2L1	No
PRKDC	Protein Kinase, DNA-Activated, Catalytic Subunit	Protein Coding	P78527	54	GC08M047773	17.9119	https://www.genecards.org/cgi-bin/carddisp.pl?gene=PRKDC	Yes
AKT2	AKT Serine/Threonine Kinase 2	Protein Coding	P31751	58	GC19M040230	17.8913	https://www.genecards.org/cgi-bin/carddisp.pl?gene=AKT2	No
CDC25C	Cell Division Cycle 25C	Protein Coding	P30307	51	GC05M138285	17.8773	https://www.genecards.org/cgi-bin/carddisp.pl?gene=CDC25C	No
CASP9	Caspase 9	Protein Coding	P55211	51	GC01M015491	17.8477	https://www.genecards.org/cgi-bin/carddisp.pl?gene=CASP9	No
CD36	CD36 Molecule	Protein Coding	P16671	53	GC07P080369	17.8399	https://www.genecards.org/cgi-bin/carddisp.pl?gene=CD36	No
PLCG2	Phospholipase C Gamma 2	Protein Coding	P16885	55	GC16P081773	17.7852	https://www.genecards.org/cgi-bin/carddisp.pl?gene=PLCG2	Yes
FXN	Frataxin	Protein Coding	Q16595	51	GC09P069035	17.7367	https://www.genecards.org/cgi-bin/carddisp.pl?gene=FXN	No
RPS6KA3	Ribosomal Protein S6 Kinase A3	Protein Coding	P51812	57	GC0XM020149	17.7066	https://www.genecards.org/cgi-bin/carddisp.pl?gene=RPS6KA3	No
CBL	Cbl Proto-Oncogene	Protein Coding	P22681	55	GC11P119206	17.7017	https://www.genecards.org/cgi-bin/carddisp.pl?gene=CBL	No
CCND1	Cyclin D1	Protein Coding	P24385	57	GC11P069641	17.6324	https://www.genecards.org/cgi-bin/carddisp.pl?gene=CCND1	Yes
ACADL	Acyl-CoA Dehydrogenase Long Chain	Protein Coding	P28330	45	GC02M210187	17.6189	https://www.genecards.org/cgi-bin/carddisp.pl?gene=ACADL	No
YARS2	Tyrosyl-TRNA Synthetase 2	Protein Coding	Q9Y2Z4	48	GC12M032851	17.6102	https://www.genecards.org/cgi-bin/carddisp.pl?gene=YARS2	No
ICAM1	Intercellular Adhesion Molecule 1	Protein Coding	P05362	54	GC19P088778	17.6091	https://www.genecards.org/cgi-bin/carddisp.pl?gene=ICAM1	No
NDUFA2	NADH:Ubiquinone Oxidoreductase Subunit A2	Protein Coding	O43678	45	GC05M140731	17.5716	https://www.genecards.org/cgi-bin/carddisp.pl?gene=NDUFA2	No
CCL2	C-C Motif Chemokine Ligand 2	Protein Coding	P13500	53	GC17P034255	17.5665	https://www.genecards.org/cgi-bin/carddisp.pl?gene=CCL2	No
RYR1	Ryanodine Receptor 1	Protein Coding	P21817	52	GC19P089493	17.5549	https://www.genecards.org/cgi-bin/carddisp.pl?gene=RYR1	Yes
MT-ATP6	Mitochondrially Encoded ATP Synthase Membrane Subunit 6	Protein Coding	P00846	36	GCMTP008531	17.5465	https://www.genecards.org/cgi-bin/carddisp.pl?gene=MT-ATP6	No
SMAD3	SMAD Family Member 3	Protein Coding	P84022	57	GC15P067063	17.5064	https://www.genecards.org/cgi-bin/carddisp.pl?gene=SMAD3	No
PRDX2	Peroxiredoxin 2	Protein Coding	P32119	50	GC19M012796	17.4497	https://www.genecards.org/cgi-bin/carddisp.pl?gene=PRDX2	No
EP300	E1A Binding Protein P300	Protein Coding	Q09472	56	GC22P056779	17.42	https://www.genecards.org/cgi-bin/carddisp.pl?gene=EP300	No
SDHB	Succinate Dehydrogenase Complex Iron Sulfur Subunit B	Protein Coding	P21912	52	GC01M018796	17.3955	https://www.genecards.org/cgi-bin/carddisp.pl?gene=SDHB	No
STAT5A	Signal Transducer And Activator Of Transcription 5A	Protein Coding	P42229	52	GC17P042287	17.3827	https://www.genecards.org/cgi-bin/carddisp.pl?gene=STAT5A	No
RHOA	Ras Homolog Family Member A	Protein Coding	P61586	54	GC03M049359	17.3561	https://www.genecards.org/cgi-bin/carddisp.pl?gene=RHOA	No
PTPN1	Protein Tyrosine Phosphatase Non-Receptor Type 1	Protein Coding	P18031	54	GC20P050510	17.3515	https://www.genecards.org/cgi-bin/carddisp.pl?gene=PTPN1	No
PRDX6	Peroxiredoxin 6	Protein Coding	P30041	51	GC01P173477	17.3265	https://www.genecards.org/cgi-bin/carddisp.pl?gene=PRDX6	No
GSTP1	Glutathione S-Transferase Pi 1	Protein Coding	P09211	54	GC11P067583	17.2641	https://www.genecards.org/cgi-bin/carddisp.pl?gene=GSTP1	No
SDHA	Succinate Dehydrogenase Complex Flavoprotein Subunit A	Protein Coding	P31040	52	GC05P000220	17.2122	https://www.genecards.org/cgi-bin/carddisp.pl?gene=SDHA	No
NDUFS3	NADH:Ubiquinone Oxidoreductase Core Subunit S3	Protein Coding	O75489	50	GC11P047575	17.1456	https://www.genecards.org/cgi-bin/carddisp.pl?gene=NDUFS3	Yes
APEX1	Apurinic/Apyrimidinic Endodeoxyribonuclease 1	Protein Coding	P27695	49	GC14P020455	17.1115	https://www.genecards.org/cgi-bin/carddisp.pl?gene=APEX1	No
OSER1	Oxidative Stress Responsive Serine Rich 1	Protein Coding	Q9NX31	37	GC20M044195	16.9941	https://www.genecards.org/cgi-bin/carddisp.pl?gene=OSER1	No
RAC1	Rac Family Small GTPase 1	Protein Coding	P63000	53	GC07P007923	16.9789	https://www.genecards.org/cgi-bin/carddisp.pl?gene=RAC1	No
PIK3CB	Phosphatidylinositol-4,5-Bisphosphate 3-Kinase Catalytic Subunit Beta	Protein Coding	P42338	52	GC03M138652	16.9547	https://www.genecards.org/cgi-bin/carddisp.pl?gene=PIK3CB	No
ACE	Angiotensin I Converting Enzyme	Protein Coding	P12821	55	GC17P063477	16.9543	https://www.genecards.org/cgi-bin/carddisp.pl?gene=ACE	No
SGK1	Serum/Glucocorticoid Regulated Kinase 1	Protein Coding	O00141	53	GC06M134169	16.9252	https://www.genecards.org/cgi-bin/carddisp.pl?gene=SGK1	No
HSF1	Heat Shock Transcription Factor 1	Protein Coding	Q00613	51	GC08P144291	16.9075	https://www.genecards.org/cgi-bin/carddisp.pl?gene=HSF1	No
PRKCG	Protein Kinase C Gamma	Protein Coding	P05129	55	GC19P053879	16.8771	https://www.genecards.org/cgi-bin/carddisp.pl?gene=PRKCG	No
JAK1	Janus Kinase 1	Protein Coding	P23458	58	GC01M064833	16.8405	https://www.genecards.org/cgi-bin/carddisp.pl?gene=JAK1	No
HBG2	Hemoglobin Subunit Gamma 2	Protein Coding	P69892	45	GC11M009156	16.8073	https://www.genecards.org/cgi-bin/carddisp.pl?gene=HBG2	No
FMO3	Flavin Containing Dimethylaniline Monoxygenase 3	Protein Coding	P31513	50	GC01P171090	16.7538	https://www.genecards.org/cgi-bin/carddisp.pl?gene=FMO3	Yes
PDGFRB	Platelet Derived Growth Factor Receptor Beta	Protein Coding	P09619	57	GC05M150113	16.7018	https://www.genecards.org/cgi-bin/carddisp.pl?gene=PDGFRB	No
CDKN2A	Cyclin Dependent Kinase Inhibitor 2A	Protein Coding	Q8N726	55	GC09M021967	16.667	https://www.genecards.org/cgi-bin/carddisp.pl?gene=CDKN2A	No
MT-ND4	Mitochondrially Encoded NADH:Ubiquinone Oxidoreductase Core Subunit 4	Protein Coding	P03905	35	GCMTP010762	16.619	https://www.genecards.org/cgi-bin/carddisp.pl?gene=MT-ND4	No
NDUFS8	NADH:Ubiquinone Oxidoreductase Core Subunit S8	Protein Coding	O00217	48	GC11P068030	16.5903	https://www.genecards.org/cgi-bin/carddisp.pl?gene=NDUFS8	No
PLA2G4A	Phospholipase A2 Group IVA	Protein Coding	P47712	52	GC01P186798	16.5769	https://www.genecards.org/cgi-bin/carddisp.pl?gene=PLA2G4A	No
MSRA	Methionine Sulfoxide Reductase A	Protein Coding	Q9UJ68	46	GC08P010054	16.5723	https://www.genecards.org/cgi-bin/carddisp.pl?gene=MSRA	No
HSPA4	Heat Shock Protein Family A (Hsp70) Member 4	Protein Coding	P34932	47	GC05P133062	16.5585	https://www.genecards.org/cgi-bin/carddisp.pl?gene=HSPA4	Yes
HRAS	HRas Proto-Oncogene, GTPase	Protein Coding	P01112	56	GC11M008886	16.4423	https://www.genecards.org/cgi-bin/carddisp.pl?gene=HRAS	No
UCP2	Uncoupling Protein 2	Protein Coding	P55851	50	GC11M073974	16.3877	https://www.genecards.org/cgi-bin/carddisp.pl?gene=UCP2	No
MAPK11	Mitogen-Activated Protein Kinase 11	Protein Coding	Q15759	51	GC22M050263	16.3683	https://www.genecards.org/cgi-bin/carddisp.pl?gene=MAPK11	No
MT-ND3	Mitochondrially Encoded NADH:Ubiquinone Oxidoreductase Core Subunit 3	Protein Coding	P03897	36	GCMTP010061	16.367	https://www.genecards.org/cgi-bin/carddisp.pl?gene=MT-ND3	No
RELA	RELA Proto-Oncogene, NF-KB Subunit	Protein Coding	Q04206	55	GC11M065653	16.3655	https://www.genecards.org/cgi-bin/carddisp.pl?gene=RELA	No
MT-CO2	Mitochondrially Encoded Cytochrome C Oxidase II	Protein Coding	P00403	38	GCMTP007587	16.3622	https://www.genecards.org/cgi-bin/carddisp.pl?gene=MT-CO2	No
KIT	KIT Proto-Oncogene, Receptor Tyrosine Kinase	Protein Coding	P10721	57	GC04P054657	16.3366	https://www.genecards.org/cgi-bin/carddisp.pl?gene=KIT	No
IL2	Interleukin 2	Protein Coding	P60568	50	GC04M122451	16.3039	https://www.genecards.org/cgi-bin/carddisp.pl?gene=IL2	No
ERBB3	Erb-B2 Receptor Tyrosine Kinase 3	Protein Coding	P21860	58	GC12P058609	16.2736	https://www.genecards.org/cgi-bin/carddisp.pl?gene=ERBB3	No
MT-ND2	Mitochondrially Encoded NADH:Ubiquinone Oxidoreductase Core Subunit 2	Protein Coding	P03891	38	GCMTP004472	16.263	https://www.genecards.org/cgi-bin/carddisp.pl?gene=MT-ND2	No
IL10	Interleukin 10	Protein Coding	P22301	52	GC01M206767	16.2582	https://www.genecards.org/cgi-bin/carddisp.pl?gene=IL10	No
ATP5F1E	ATP Synthase F1 Subunit Epsilon	Protein Coding	P56381	46	GC20M059026	16.207	https://www.genecards.org/cgi-bin/carddisp.pl?gene=ATP5F1E	No
COX4I1	Cytochrome C Oxidase Subunit 4I1	Protein Coding	P13073	50	GC16P085798	16.2005	https://www.genecards.org/cgi-bin/carddisp.pl?gene=COX4I1	No
NDUFB10	NADH:Ubiquinone Oxidoreductase Subunit B10	Protein Coding	O96000	47	GC16P052427	16.1804	https://www.genecards.org/cgi-bin/carddisp.pl?gene=NDUFB10	No
CDK7	Cyclin Dependent Kinase 7	Protein Coding	P50613	50	GC05P069547	16.173	https://www.genecards.org/cgi-bin/carddisp.pl?gene=CDK7	No
AGTR1	Angiotensin II Receptor Type 1	Protein Coding	P30556	55	GC03P148697	16.1501	https://www.genecards.org/cgi-bin/carddisp.pl?gene=AGTR1	No
TH	Tyrosine Hydroxylase	Protein Coding	P07101	54	GC11M002163	16.1038	https://www.genecards.org/cgi-bin/carddisp.pl?gene=TH	No
VCAM1	Vascular Cell Adhesion Molecule 1	Protein Coding	P19320	50	GC01P100719	16.0949	https://www.genecards.org/cgi-bin/carddisp.pl?gene=VCAM1	No
BCS1L	BCS1 Homolog, Ubiquinol-Cytochrome C Reductase Complex Chaperone	Protein Coding	Q9Y276	48	GC02P218658	16.0539	https://www.genecards.org/cgi-bin/carddisp.pl?gene=BCS1L	No
CYP2D6	Cytochrome P450 Family 2 Subfamily D Member 6	Protein Coding	P10635	50	GC22M042126	16.0517	https://www.genecards.org/cgi-bin/carddisp.pl?gene=CYP2D6	No
AGT	Angiotensinogen	Protein Coding	P01019	53	GC01M230690	16.0512	https://www.genecards.org/cgi-bin/carddisp.pl?gene=AGT	No
CAMK2A	Calcium/Calmodulin Dependent Protein Kinase II Alpha	Protein Coding	Q9UQM7	56	GC05M150219	16.0194	https://www.genecards.org/cgi-bin/carddisp.pl?gene=CAMK2A	No
GRK2	G Protein-Coupled Receptor Kinase 2	Protein Coding	P25098	51	GC11P067266	15.9923	https://www.genecards.org/cgi-bin/carddisp.pl?gene=GRK2	No
YWHAZ	Tyrosine 3-Monooxygenase/Tryptophan 5-Monooxygenase Activation Protein Zeta	Protein Coding	P63104	51	GC08M100917	15.979	https://www.genecards.org/cgi-bin/carddisp.pl?gene=YWHAZ	No
PPARA	Peroxisome Proliferator Activated Receptor Alpha	Protein Coding	Q07869	48	GC22P046150	15.9323	https://www.genecards.org/cgi-bin/carddisp.pl?gene=PPARA	No
STK11	Serine/Threonine Kinase 11	Protein Coding	Q15831	54	GC19P001177	15.9154	https://www.genecards.org/cgi-bin/carddisp.pl?gene=STK11	No
MAP2K2	Mitogen-Activated Protein Kinase Kinase 2	Protein Coding	P36507	58	GC19M004090	15.8953	https://www.genecards.org/cgi-bin/carddisp.pl?gene=MAP2K2	No
APOE	Apolipoprotein E	Protein Coding	P02649	54	GC19P089740	15.865	https://www.genecards.org/cgi-bin/carddisp.pl?gene=APOE	Yes
NDUFB9	NADH:Ubiquinone Oxidoreductase Subunit B9	Protein Coding	Q9Y6M9	48	GC08P124539	15.8557	https://www.genecards.org/cgi-bin/carddisp.pl?gene=NDUFB9	No
CFTR	CF Transmembrane Conductance Regulator	Protein Coding	P13569	55	GC07P117287	15.8331	https://www.genecards.org/cgi-bin/carddisp.pl?gene=CFTR	No
MIR7-3HG	MIR7-3 Host Gene	RNA Gene	Q8N6C7	27	GC19P008873	15.7955	https://www.genecards.org/cgi-bin/carddisp.pl?gene=MIR7-3HG	No
SLC25A20	Solute Carrier Family 25 Member 20	Protein Coding	O43772	49	GC03M048909	15.7751	https://www.genecards.org/cgi-bin/carddisp.pl?gene=SLC25A20	No
FBXL4	F-Box And Leucine Rich Repeat Protein 4	Protein Coding	Q9UKA2	44	GC06M098868	15.7711	https://www.genecards.org/cgi-bin/carddisp.pl?gene=FBXL4	No
APOA1	Apolipoprotein A1	Protein Coding	P02647	54	GC11M116835	15.7626	https://www.genecards.org/cgi-bin/carddisp.pl?gene=APOA1	No
DYNLL1	Dynein Light Chain LC8-Type 1	Protein Coding	P63167	46	GC12P120469	15.7411	https://www.genecards.org/cgi-bin/carddisp.pl?gene=DYNLL1	No
BLVRB	Biliverdin Reductase B	Protein Coding	P30043	44	GC19M040447	15.7396	https://www.genecards.org/cgi-bin/carddisp.pl?gene=BLVRB	No
JAK3	Janus Kinase 3	Protein Coding	P52333	55	GC19M017824	15.7381	https://www.genecards.org/cgi-bin/carddisp.pl?gene=JAK3	No
GSTM1	Glutathione S-Transferase Mu 1	Protein Coding	P09488	46	GC01P109687	15.6625	https://www.genecards.org/cgi-bin/carddisp.pl?gene=GSTM1	No
P4HB	Prolyl 4-Hydroxylase Subunit Beta	Protein Coding	P07237	53	GC17M081843	15.6242	https://www.genecards.org/cgi-bin/carddisp.pl?gene=P4HB	No
ALDH3A2	Aldehyde Dehydrogenase 3 Family Member A2	Protein Coding	P51648	50	GC17P019648	15.5986	https://www.genecards.org/cgi-bin/carddisp.pl?gene=ALDH3A2	No
EIF2AK3	Eukaryotic Translation Initiation Factor 2 Alpha Kinase 3	Protein Coding	Q9NZJ5	53	GC02M088556	15.5776	https://www.genecards.org/cgi-bin/carddisp.pl?gene=EIF2AK3	Yes
SQSTM1	Sequestosome 1	Protein Coding	Q13501	53	GC05P179806	15.5697	https://www.genecards.org/cgi-bin/carddisp.pl?gene=SQSTM1	No
INPP5D	Inositol Polyphosphate-5-Phosphatase D	Protein Coding	Q92835	48	GC02P233059	15.5658	https://www.genecards.org/cgi-bin/carddisp.pl?gene=INPP5D	No
KEAP1	Kelch Like ECH Associated Protein 1	Protein Coding	Q14145	53	GC19M010486	15.5606	https://www.genecards.org/cgi-bin/carddisp.pl?gene=KEAP1	No
CYP1A1	Cytochrome P450 Family 1 Subfamily A Member 1	Protein Coding	P04798	51	GC15M074719	15.5579	https://www.genecards.org/cgi-bin/carddisp.pl?gene=CYP1A1	No
PRDX5	Peroxiredoxin 5	Protein Coding	P30044	47	GC11P064831	15.5553	https://www.genecards.org/cgi-bin/carddisp.pl?gene=PRDX5	No
MT-ND5	Mitochondrially Encoded NADH:Ubiquinone Oxidoreductase Core Subunit 5	Protein Coding	P03915	37	GCMTP012339	15.4972	https://www.genecards.org/cgi-bin/carddisp.pl?gene=MT-ND5	No
ATR	ATR Serine/Threonine Kinase	Protein Coding	Q13535	57	GC03M142449	15.4654	https://www.genecards.org/cgi-bin/carddisp.pl?gene=ATR	No
CYP2E1	Cytochrome P450 Family 2 Subfamily E Member 1	Protein Coding	P05181	50	GC10P133520	15.4563	https://www.genecards.org/cgi-bin/carddisp.pl?gene=CYP2E1	No
PTPN3	Protein Tyrosine Phosphatase Non-Receptor Type 3	Protein Coding	P26045	47	GC09M109375	15.455	https://www.genecards.org/cgi-bin/carddisp.pl?gene=PTPN3	Yes
UCP3	Uncoupling Protein 3	Protein Coding	P55916	46	GC11M074000	15.4267	https://www.genecards.org/cgi-bin/carddisp.pl?gene=UCP3	No
BMP6	Bone Morphogenetic Protein 6	Protein Coding	P22004	49	GC06P007726	15.4257	https://www.genecards.org/cgi-bin/carddisp.pl?gene=BMP6	Yes
CRP	C-Reactive Protein	Protein Coding	P02741	50	GC01M159733	15.4011	https://www.genecards.org/cgi-bin/carddisp.pl?gene=CRP	No
STK4	Serine/Threonine Kinase 4	Protein Coding	Q13043	53	GC20P044966	15.3959	https://www.genecards.org/cgi-bin/carddisp.pl?gene=STK4	No
OSGIN2	Oxidative Stress Induced Growth Inhibitor Family Member 2	Protein Coding	Q9Y236	35	GC08P089901	15.3842	https://www.genecards.org/cgi-bin/carddisp.pl?gene=OSGIN2	No
CAMK1	Calcium/Calmodulin Dependent Protein Kinase I	Protein Coding	Q14012	46	GC03M009774	15.3838	https://www.genecards.org/cgi-bin/carddisp.pl?gene=CAMK1	No
CSNK2B	Casein Kinase 2 Beta	Protein Coding	P67870	52	GC06P112001	15.3737	https://www.genecards.org/cgi-bin/carddisp.pl?gene=CSNK2B	No
BRAF	B-Raf Proto-Oncogene, Serine/Threonine Kinase	Protein Coding	P15056	58	GC07M140754	15.3652	https://www.genecards.org/cgi-bin/carddisp.pl?gene=BRAF	No
NDUFS7	NADH:Ubiquinone Oxidoreductase Core Subunit S7	Protein Coding	O75251	50	GC19P008537	15.3498	https://www.genecards.org/cgi-bin/carddisp.pl?gene=NDUFS7	No
SGCB	Sarcoglycan Beta	Protein Coding	Q16585	44	GC04M052019	15.3352	https://www.genecards.org/cgi-bin/carddisp.pl?gene=SGCB	No
EPO	Erythropoietin	Protein Coding	P01588	47	GC07P100720	15.3074	https://www.genecards.org/cgi-bin/carddisp.pl?gene=EPO	No
AURKB	Aurora Kinase B	Protein Coding	Q96GD4	55	GC17M014442	15.2546	https://www.genecards.org/cgi-bin/carddisp.pl?gene=AURKB	No
CCNB1	Cyclin B1	Protein Coding	P14635	51	GC05P069167	15.2272	https://www.genecards.org/cgi-bin/carddisp.pl?gene=CCNB1	No
HMGB1	High Mobility Group Box 1	Protein Coding	P09429	52	GC13M030456	15.2218	https://www.genecards.org/cgi-bin/carddisp.pl?gene=HMGB1	No
CREBBP	CREB Binding Protein	Protein Coding	Q92793	58	GC16M013493	15.2147	https://www.genecards.org/cgi-bin/carddisp.pl?gene=CREBBP	No
GCK	Glucokinase	Protein Coding	P35557	53	GC07M044887	15.2142	https://www.genecards.org/cgi-bin/carddisp.pl?gene=GCK	No
PTPA	Protein Phosphatase 2 Phosphatase Activator	Protein Coding	Q15257	47	GC09P130804	15.1888	https://www.genecards.org/cgi-bin/carddisp.pl?gene=PTPA	No
VASP	Vasodilator Stimulated Phosphoprotein	Protein Coding	P50552	48	GC19P089755	15.1716	https://www.genecards.org/cgi-bin/carddisp.pl?gene=VASP	No
CDK9	Cyclin Dependent Kinase 9	Protein Coding	P50750	50	GC09P130694	15.165	https://www.genecards.org/cgi-bin/carddisp.pl?gene=CDK9	No
ATF4	Activating Transcription Factor 4	Protein Coding	P18848	50	GC22P039519	15.1207	https://www.genecards.org/cgi-bin/carddisp.pl?gene=ATF4	No
MET	MET Proto-Oncogene, Receptor Tyrosine Kinase	Protein Coding	P08581	58	GC07P116672	15.1143	https://www.genecards.org/cgi-bin/carddisp.pl?gene=MET	Yes
CP	Ceruloplasmin	Protein Coding	P00450	52	GC03M149162	15.1111	https://www.genecards.org/cgi-bin/carddisp.pl?gene=CP	No
AURKA	Aurora Kinase A	Protein Coding	O14965	55	GC20M056370	15.0652	https://www.genecards.org/cgi-bin/carddisp.pl?gene=AURKA	No
MT-CO3	Mitochondrially Encoded Cytochrome C Oxidase III	Protein Coding	P00414	33	GCMTP009209	15.063	https://www.genecards.org/cgi-bin/carddisp.pl?gene=MT-CO3	No
AR	Androgen Receptor	Protein Coding	P10275	55	GC0XP067544	15.0612	https://www.genecards.org/cgi-bin/carddisp.pl?gene=AR	No
NUDT1	Nudix Hydrolase 1	Protein Coding	P36639	46	GC07P002242	15.0599	https://www.genecards.org/cgi-bin/carddisp.pl?gene=NUDT1	No
